# Supplementary material for: Can the Blended Application of Controlled-Release and Common Urea Effectively Replace the Common Urea in a Wheat–Maize Rotation System? A Case Study Based on a Long–Term Experiment
Source: MDPI journal article supplement (doi:10.3390/plants12244085), 2023-12-06
Supplement: s1 [file s1]

## Can the Blended Application of Controlled-Release and Common Urea Effectively Replace the Common Urea in a Wheat-Maize Rotation System? A Case Study Based on a Long-Term Experiment

Ling Zhang<sup>1,†</sup>, Wen-Tao Xue<sup>1,†</sup>, Hao Sun<sup>1</sup>, Yun-Cai Hu<sup>2</sup>, Rong Wu<sup>1</sup>, Ye Tian<sup>1</sup>, Yi-Shan Chen<sup>1</sup>, Liang Ma<sup>1</sup>, Qian Chen<sup>1</sup>, Ying Du<sup>1</sup>, Yang Bai<sup>1</sup>, Shan-Jiang Liu<sup>1,\*</sup>, Guo-Yuan Zou<sup>1,\*</sup>

1. Institute of Plant Nutrition, Resources and Environment, Beijing Academy of Agriculture and Forestry Sciences, Beijing 100097, China; 18854806552@163.com (L.Z.); xwtbj2014@163.com (W.-T.X.); yoyo1106@126.com (H.S.); 17310215735@163.com (R.W.); 82tianye@sina.com (Y.T.); cys8320@163.com (Y.-S.Z.); maliangyouyou@sina.com (L.M.); c.q.123@163.com (Q.C.); doings@msn.cn (Y.D.); jiangxuehanshuang@hotmail.com (Y.B.); liushanjiang@263.net (S.-J.Z.); gyzou@163.com (G.-Y.Z.)

2. Department of Plant Sciences, Chair of Plant Nutrition, Technical University of Munich, 85354 Freising, Germany; [yc.hu@tum.de](mailto:yc.hu@tum.de) (Y.-C.H)

† These authors contributed equally to this work.

\*Correspondence: [liushanjiang@263.net](mailto:liushanjiang@263.net); [gyzou@163.com](mailto:gyzou@163.com)

## Supplemental Tables. S1-S7

**Table S1**

ANOVA table on the effects of N management strategies and years on grain yield.

|       | Source | df | Anova SS | Mean Square | F value | P value |
|-------|--------|----|----------|-------------|---------|---------|
| Wheat | Year   | 12 | 46.1     | 3.8         | 6.25    | <0.0001 |
|       | N      | 2  | 565.9    | 282.9       | 461.39  | <0.0001 |
|       | Year*N | 24 | 68.1     | 2.8         | 4.63    | <0.0001 |
| Maize | Year   | 12 | 103.1    | 8.6         | 17.89   | <0.0001 |
|       | N      | 2  | 466.4    | 233.2       | 485.47  | <0.0001 |
|       | Year*N | 24 | 45.7     | 1.9         | 3.96    | <0.0001 |

**Table S2**

ANOVA table on the effects of N management strategies on N uptake.

|                             | Source | df | Anova SS | Mean Square | F value | P value |
|-----------------------------|--------|----|----------|-------------|---------|---------|
| N uptake in wheat           | N      | 2  | 29588    | 14794       | 1028.47 | <0.0001 |
| N uptake in maize           | N      | 2  | 29588    | 14794       | 1028.47 | <0.0001 |
| N uptake in rotation system | N      | 2  | 99738    | 49869       | 335.57  | <0.0001 |

**Table S3**

ANOVA table on the effects of N management strategies on soil C inorganic N stock, soil organic N stock and soil organic C stock.

|                        | Source | df | Anova SS | Mean Square | F value | P value |
|------------------------|--------|----|----------|-------------|---------|---------|
| soil inorganic N stock | N      | 2  | 2142.4   | 1071.2      | 40.72   | 0.0003  |
| soil organic N stock   | N      | 2  | 20157.1  | 10078.6     | 4.14    | 0.0741  |
| soil organic C stock   | N      | 2  | 23.4     | 11.7        | 3.60    | 0.0939  |

**Table S4**

ANOVA table on the effects of N management strategies on N footprint.

|                                | Source | df | Anova SS | Mean Square | F value | P value |
|--------------------------------|--------|----|----------|-------------|---------|---------|
| N footprint in maize           | N      | 2  | 78.2     | 39.1        | 341.66  | <0.0001 |
| N footprint in wheat           | N      | 2  | 48.4     | 24.2        | 315.35  | <0.0001 |
| N footprint in rotation system | N      | 2  | 65.6     | 32.8        | 436.8   | <0.0001 |

**Table S5**

ANOVA table on the effects of N management strategies on C footprint.

|                                | Source | df | Anova SS | Mean Square | F value | P value |
|--------------------------------|--------|----|----------|-------------|---------|---------|
| C footprint in maize           | N      | 2  | 156382   | 78191       | 40.55   | 0.0003  |
| C footprint in wheat           | N      | 2  | 22685    | 11342       | 61.51   | 0.0001  |
| C footprint in rotation system | N      | 2  | 6344     | 3172        | 8.97    | 0.0157  |

**Table S6**

Reactive N emissions and GHG emissions factors for production and transportation of various agricultural inputs in the winter wheat-summer maize system.

| Item                                          | Unit                             | Reactive N emission<br>( $10^{-3}$ kg N unit $^{-1}$ ) | GHG emission<br>(kg CO <sub>2</sub> eq unit $^{-1}$ ) |
|-----------------------------------------------|----------------------------------|--------------------------------------------------------|-------------------------------------------------------|
| Production and transportation of urea         | kg N                             | 7.15                                                   | 8.30                                                  |
| Production and transportation of CRU*         | kg N                             | 7.15                                                   | 9.02                                                  |
| Production and transportation of P fertilizer | kg P <sub>2</sub> O <sub>5</sub> | 0.184                                                  | 0.79                                                  |
| Production and transportation of K fertilizer | kg K <sub>2</sub> O              | 0.146                                                  | 0.55                                                  |
| Production and transportation of herbicide    | kg                               | 4.69                                                   | 19.13                                                 |
| Electricity used for irrigation               | kWh                              | 1.97                                                   | 0.95                                                  |
| Diesel fuel                                   | L                                | 2.86                                                   | 3.75                                                  |

\*Compared with urea, the production and transportation of CRU mainly increased the electricity and diesel fuel consumption, resulting in 0.72 kg CO<sub>2</sub> eq more GHG emission for 1 kg CRU; while the reactive N losses difference between two N fertilizer could be negligible.

**Table S7**

Mean application rate of various agricultural inputs in 2008-2022 in the winter wheat-summer maize system.

|              | P fertilizer<br>(kg P <sub>2</sub> O <sub>5</sub> ha $^{-1}$ ) | K fertilizer<br>(kg K <sub>2</sub> O ha $^{-1}$ ) | Pesticides<br>(kg ha $^{-1}$ ) | Diesel fuel<br>(L ha $^{-1}$ ) | Electricity for irrigation<br>(kWh) |
|--------------|----------------------------------------------------------------|---------------------------------------------------|--------------------------------|--------------------------------|-------------------------------------|
| winter wheat | 90                                                             | 90                                                | 4.5                            | 45                             | 1575*                               |
| summer maize | 90                                                             | 90                                                | 3.8                            | 60                             | 675*                                |

\*value was the electricity used for irrigation, which was calculated by the irrigation electricity use quantity (450 kWh per irrigation in the NCP) multiplied by average irrigation time (3.5 time in wheat season and 1.5 times in maize season).

## Reference

- Clark, S.; Khoshnevisan, B.; Sefeedpari, P. Energy efficiency and greenhouse gas emissions during transition to organic and reduced-input practices: Student farm case study. *Ecol. Eng.* **2016**, *88*, 186–194.
- Cui, Z.; Yue, S.; Wang, G.; Meng, Q.; Wu, L.; Yang, Z.; Zhang, Q.; Li, S.; Zhang, F.; Chen, X. In-season root-zone N management for mitigating greenhouse gas emission and reactive N losses in intensive wheat production. *Environ. Sci. Technol.* **2013**, *47*, 6015–6022.
- Huang, J.; Chen, Y.; Sui, P.; Gao, W. Estimation of net greenhouse gas balance using crop- and soil-based approaches: Two case studies. *Sci. Total Environ.* **2013**, *456*, 299–306.
- Pishgar-Komleh, S.H.; Omid, M.; Heidari, M.D. On the study of energy use and GHG (greenhouse gas) emissions in greenhouse cucumber production in Yazd province. *Energy* **2013**, *59*, 63–71.
- Williams, A.G.; Audsley, E.; Sandars, D.L. Determining the environmental burdens and resource use in the production of agricultural commodities. Final report to Defra on project ISO205. **2006**. Available on [www.agrilca.org](http://www.agrilca.org) and [www.defra.gov.uk](http://www.defra.gov.uk).
- Yue, S. Optimum Nitrogen Management for High-yielding Wheat and Maize Cropping System. Ph.D. Thesis, China Agricultural University, Beijing, China, **2013**.
- Zhang, W.; Dou, Z.; He, P.; Ju, X.; Powlson, D.; Chadwick, D.; Norse, D.; Lu, Y.; Zhang, Y.; Wu, L.; Chen, X.; Cassman, K.G.; Zhang, F. New technologies reduce greenhouse gas emissions from nitrogenous fertilizer in China. *P. Natl. Acad. Sci. USA.* **2013**, *110*, 8375–8380.
- Zhang, W. Greenhouse gas emissions and reactive nitrogen losses assessment, mitigation potentials and management approaches of maize production in China. Ph.D. Thesis, China Agricultural University, Beijing, China, **2019**.
